# Supplementary material
Source: publisher figshare collection journal article supplement (https://springernature.figshare.com/ndownloader/files/22572869)
Supplement: Supplementary file [file 22572869]

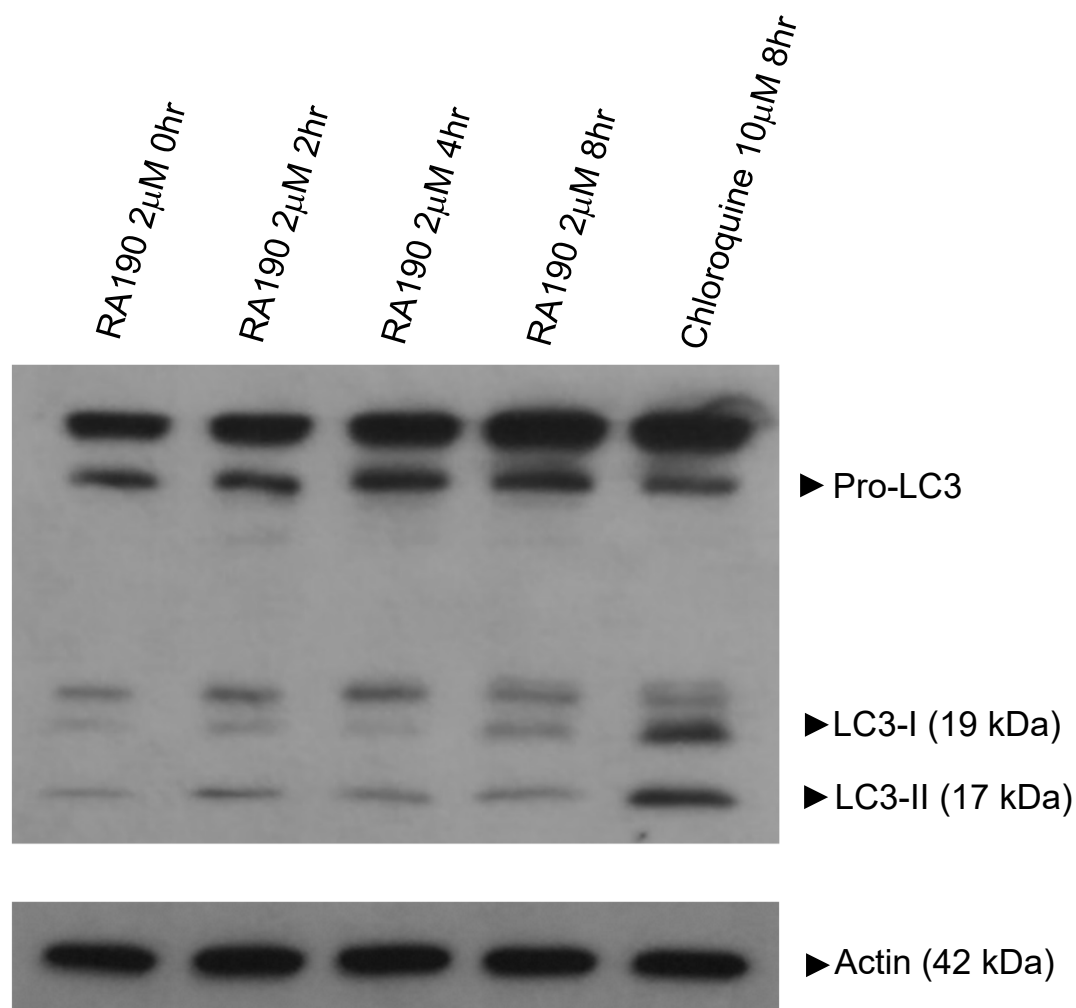

**Figure S1. RA190 treatment HepG2 cell lines did not activate the autophagy pathway.** HepG2 cells treated with 2  $\mu$ M RA190 or 10  $\mu$ M chloroquine (positive control) for 8 hr and then lysates were analyzed by Western blot with antibody to LC3. The lipidated LC3-II was not elevated within 8 hr in the RA190 group (full-length blots/gels are presented in Figure S9) .

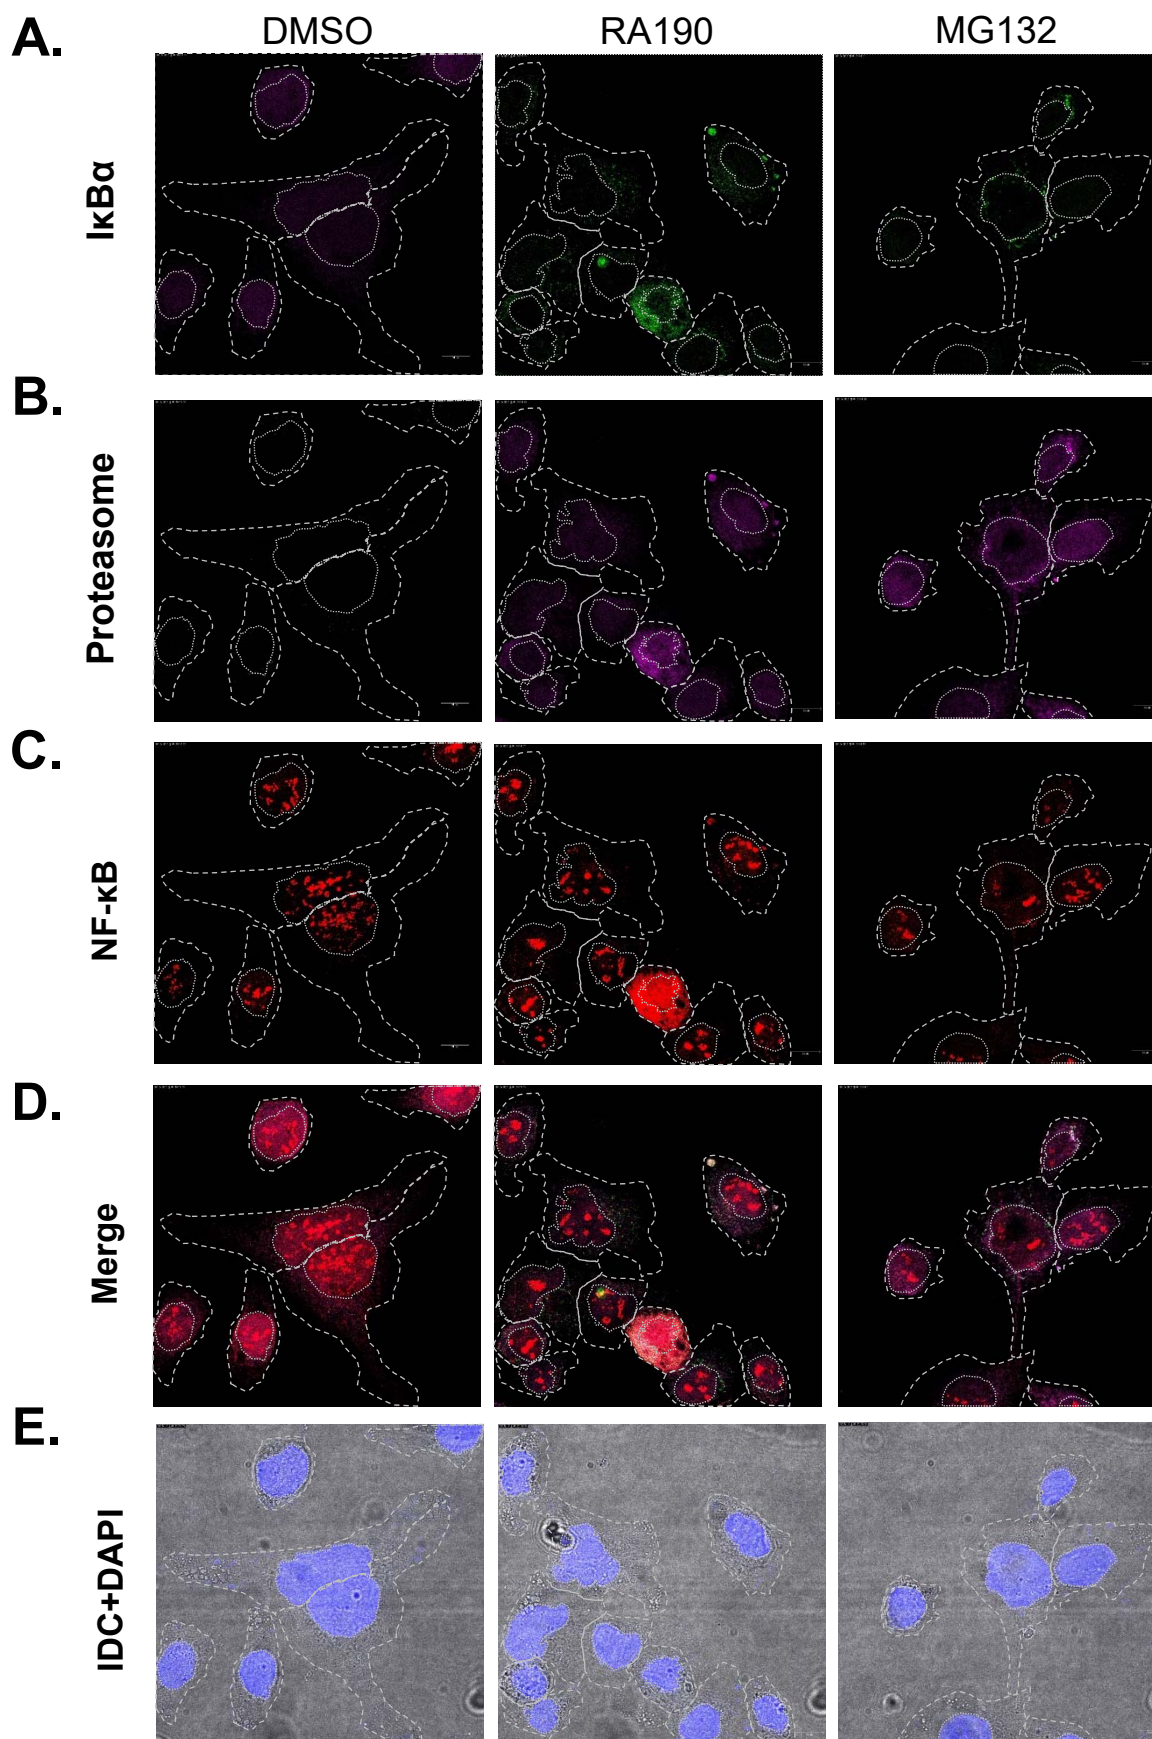

**Figure S2. Immunostaining of NF- $\kappa$ B and I $\kappa$ B after treating with RA190.** Lower magnification views of Fig.5. The HepG2 cells were treated with DMSO, 2  $\mu$ M RA190 or 25  $\mu$ M MG132 for 30 min, and stained for I $\kappa$ B $\alpha$  (A), proteasome (B), or NF- $\kappa$ B (C), and viewed by confocal fluorescence microscopy individually, or (D) merged, or (E) under phase contrast

**Fig. S3**

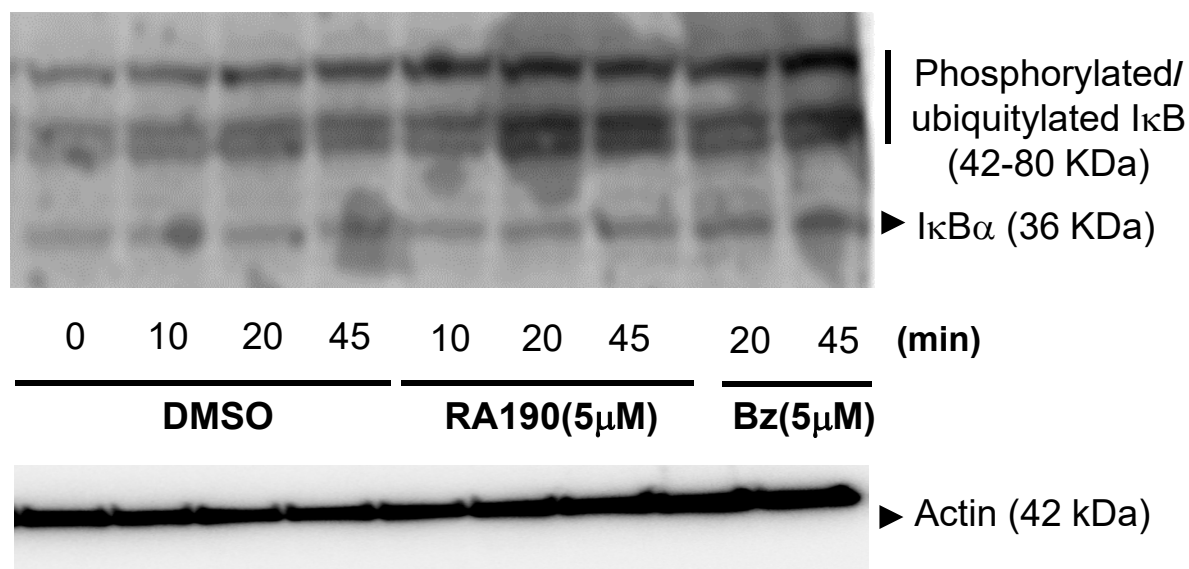

**Figure S3. RA190 treatment of HepG2 cells produced significant accumulation of phosphorylated/ubiquitinated IκBα.** HepG2 cells were treated by 5 μM RA190, 5 μM bortezomib and DMSO for 0, 10, 20 and 45 min, harvested, lysed and each sample was subjected to Western blot with antibody to IκB and Actin. The phosphorylated/ ubiquitinated IκBα accumulated in RA190 and bortezomib-treated cells (full-length blots/gels are presented in Figure S10).
